# Supplementary material for: Electric-Field-Assisted Synthesis of Cu/MoS2 Nanostructures for Efficient Hydrogen Evolution Reaction
Source: MDPI journal article supplement (doi:10.3390/mi15040495), 2024-04-03
Supplement: s1 [file s1]

# Supporting Information

## **Electric-Field-Assisted Synthesis of Cu/MoS<sub>2</sub> Nanostructures for Efficient Hydrogen Evolution Reaction**

Surra Yonas<sup>a</sup>, Birhanu Bayissa Gicha<sup>b</sup>, Samir Adhikari<sup>c</sup>, Fedlu Kedir Sabir<sup>a</sup>, Van Tan Tran<sup>e</sup>, Njemuwa Nwaji<sup>f</sup>, Bedasa Abdissa Gonfa<sup>a,\*</sup>, Lemma Teshome Tufa<sup>a,b,\*</sup>

<sup>a</sup>Department of Applied Chemistry, Adama Science and Technology University, P.O.Box 1888, Adama, Ethiopia

<sup>b</sup>Research Institute of Materials Chemistry, Chungnam National University, Daejeon 34134, Republic of Korea

<sup>c</sup>Department of Physics, Chungnam National University, Daejeon, 34134, Republic of Korea

<sup>d</sup>Faculty of Biotechnology, Chemistry and Environmental Engineering, Phenikaa University, Hanoi 10000, Viet Nam

<sup>f</sup>Institute of Fundamental Technological Research, Polish Academy of Sciences, 02-106, Warsaw, Poland

Corresponding authors: BAG, [bedassa.abdissa@astu.edu.et](mailto:bedassa.abdissa@astu.edu.et); LTT, [lemmat2003@yahoo.com](mailto:lemmat2003@yahoo.com)

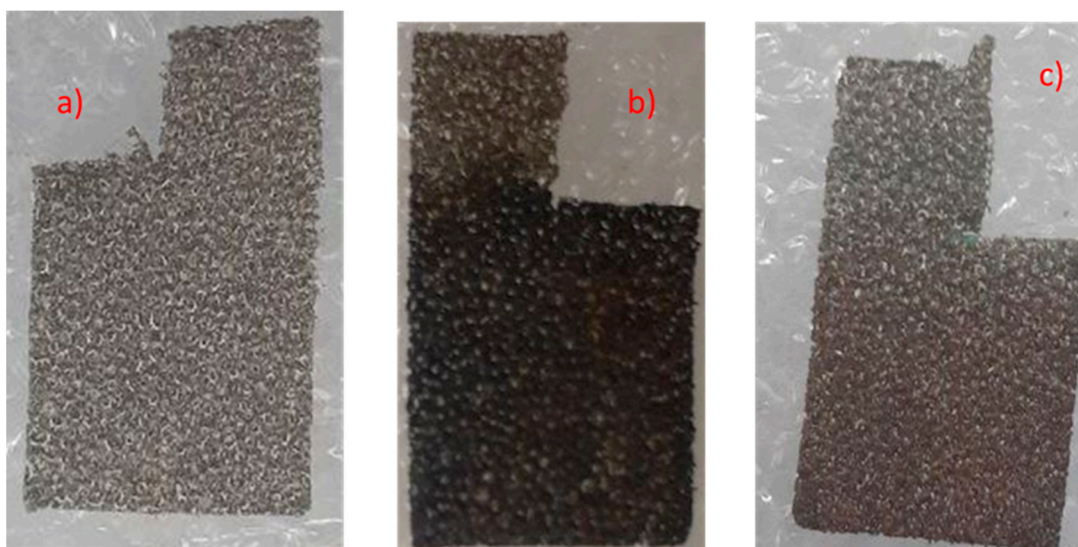

**Figure S1.** Digital photographs of (a) bare NF, (b) MS, and (c) CMS NSs

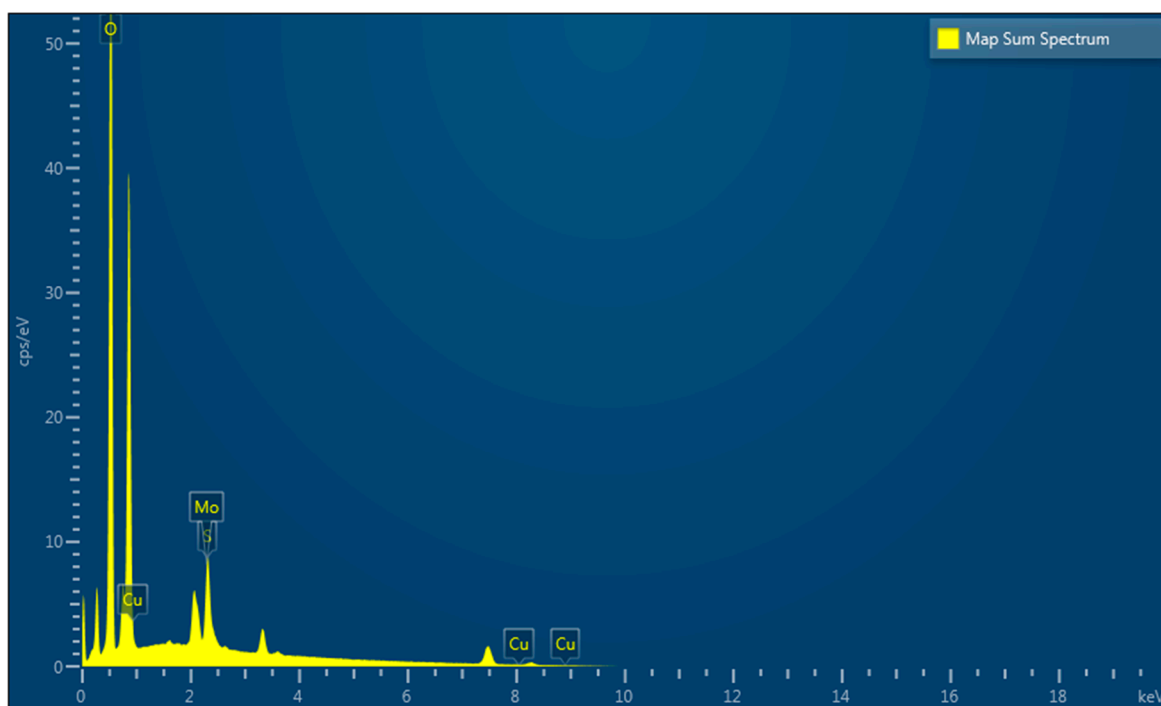

Figure S2. SEM-EDS spectrum of 10-CMS

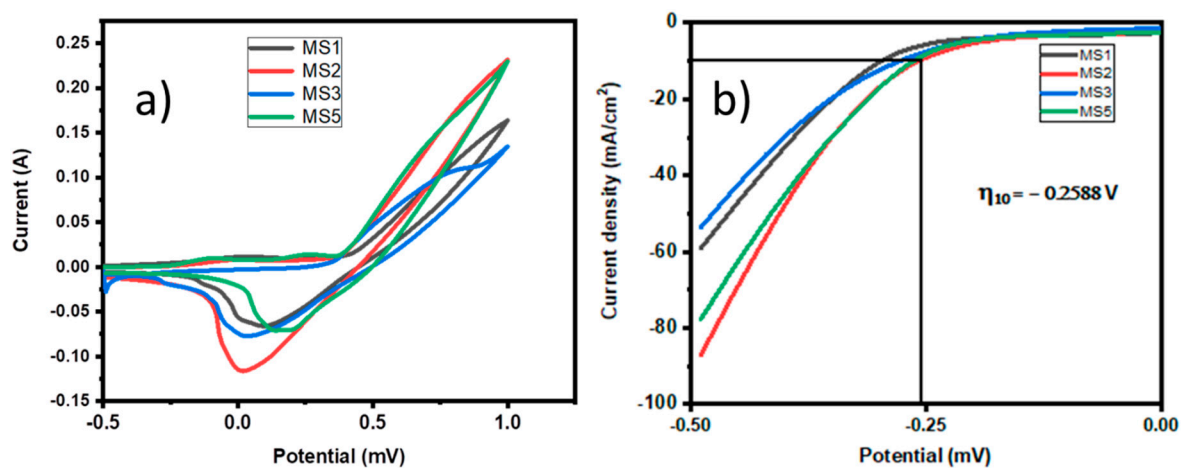

**Figure S3.** (a) CV curves recorded at a scan rate of  $50 \text{ mV s}^{-1}$ , Electrochemical performance of various MS NSs electrodes carried out under a constant current density of  $10 \text{ mA cm}^{-2}$  in 1 M KOH aqueous solution. (b) HER polarization curves

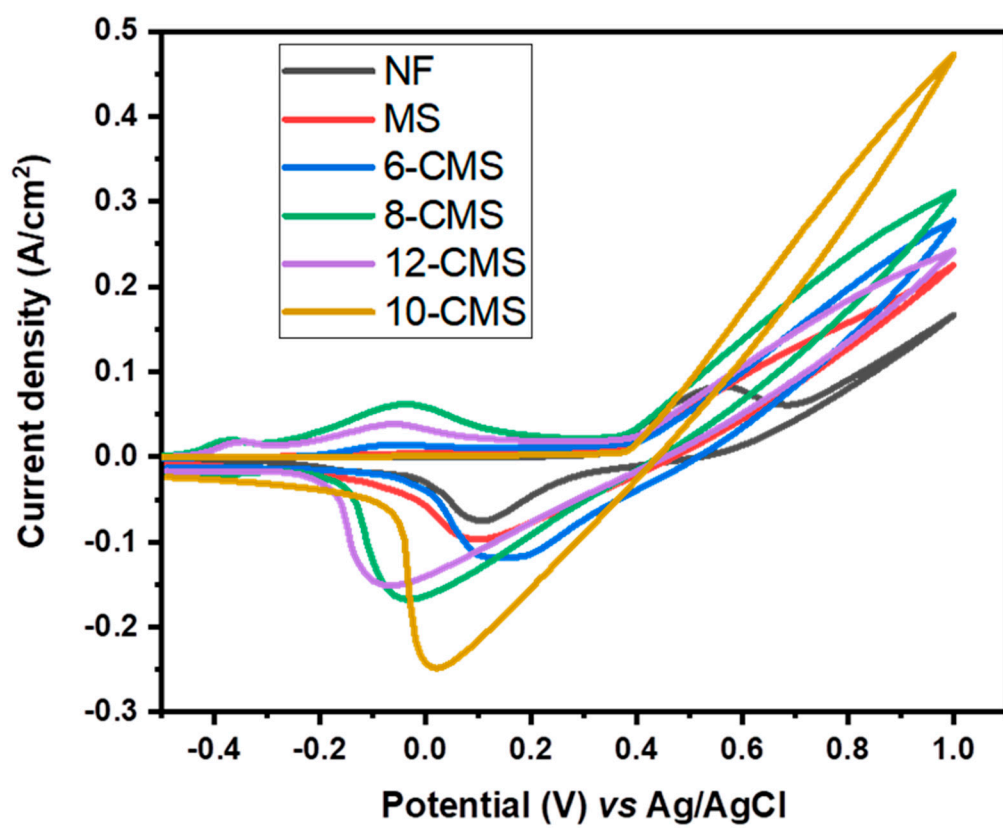

Figure S4 : CV curves of NF, MoS<sub>2</sub>, and CMS s recorded at a scan rate of 50 mV s<sup>-1</sup>.

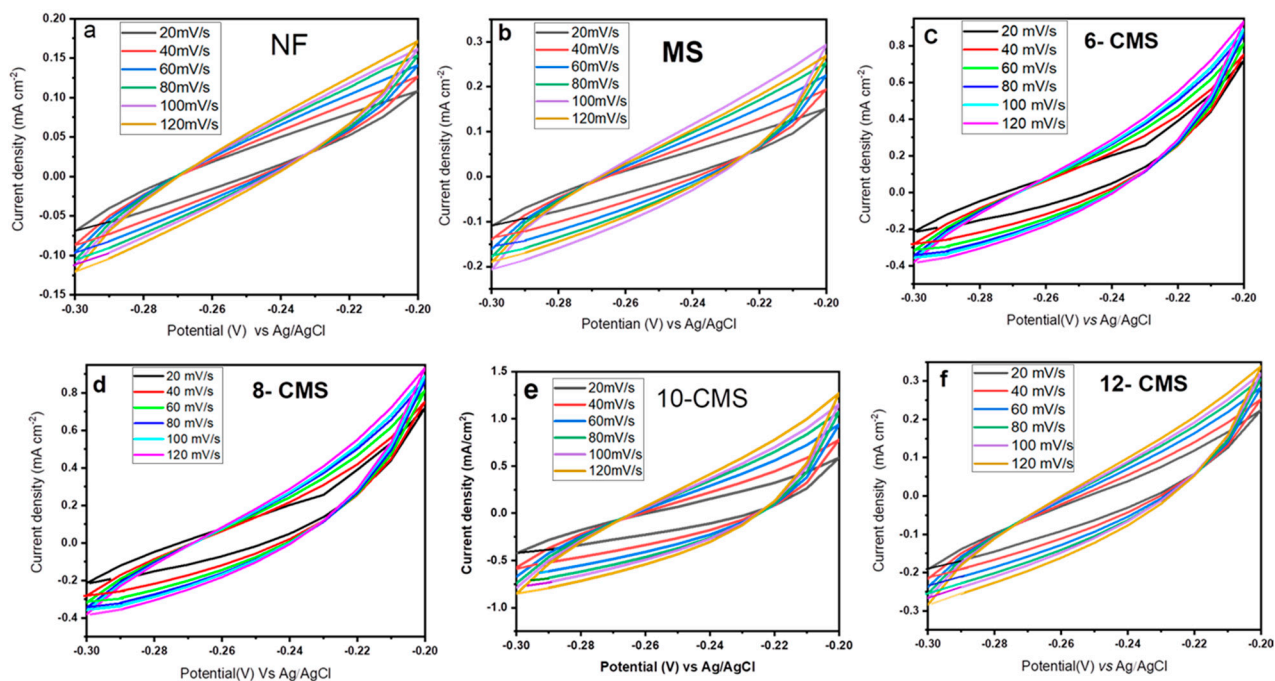

Figure S5: Double layer capacitance measurements with scan rates at 20, 40, 60, 80, 100 and 120 mV/s in the region of  $-0.3$  to  $-0.2$  V vs. Ag/AgCl for CMS/NF.
